# Supplementary material for: Phytotoxin production in Aspergillus terreus is regulated by independent environmental signals
Source: eLife. 2015 Jul 14;4:e07861. doi: 10.7554/eLife.07861 (PMC4528345; doi:10.7554/eLife.07861)
Supplement: Figure 4—source data 1. — DOI: http://dx.doi.org/10.7554/eLife.07861.010 [file elife-07861-fig4-data1.doc]

Figure 4 – Source Data 1. Genotypes of strains used in the study.

| Strain | Genotype | Reference |
| --- | --- | --- |
| *Aspergillus niger* FGSC A1144 | wild type | FGSC; Kansas City; USA |
| *Aspergillus nidulans* FGSC A4 | wild type | FGSC; Kansas City; USA |
| *Aspergillus fumigatus* ATCC 46645 | wild type | ATCC; Manassas; USA |
| *Aspergillus fumigatus* FGSC A1163 (alternate name: CBS 144.89) | wild type | FGSC; Kansas City; USA |
| *Fusarium graminearum* FGSC 9975 | wild type | FGSC; Kansas City; USA |
| *Aspergillus terreus* FGSC A1156  (alternate name: NIH 2624) | wild type | FGSC; Kansas City; USA |
| *Aspergillus terreus* SBUG844 | wild type | HKI; Jena; Germany |
| SBUG844*akuB* | *akuB*::*hph* | Gressler *et al.*, 2011 |
| SBUG844*akuB**terA* | *akuB*::*hph*; *terA*::*ptrA* | Zaehle *et al*., 2014 |
| SBUG844*akuB**terR* | *akuB*::*hph*; *terR*::*ptrA* | Zaehle *et al*., 2014 |
| SBUG844_P*terA*:*lacZ* | *ptrA*, P*terA*:*lacZ*:*trpC*T | This study. |
| SBUG844_AnP*gpdA*:*atfA* | *hph*, AnP*gpdA*:*atfA:atfA*T | This study. |
| SBUG844*akuB**cpcA* | *akuB*::*hph*; *cpcA*::*ptrA* | This study. |
| SBUG844*akuB**rhbA* | *akuB*::*hph*; *rhbA*::*ptrA* | This study. |
| SBUG844*akuB**areA* | *akuB*::*hph*; *areA*::*ptrA* | This study. |
| SBUG844*akuB**areA/areA*c | *akuB*::*hph*; *areA*::*areA*CA1156 | This study. |
| SBUG844*akuB**atfA* | *akuB*::*hph*; *atfA*::*ptrA* | This study. |
| SBUG844*akuB**atfA/atfA*C | *akuB*::*hph*; *atfA*::*atfA*C, *ble* | This study. |
| SBUG844*akuB**areA**atfA* | *akuB*::*hph*; *areA*::*ptrA;* *atfA*::*ble* | This study. |
| SBUG844*akuB**areA**atfA*::AnP*gpdA*:*terR* | *akuB*::*hph*; *areA*::*ptrA;* *atfA*::AnP*gpdA*:*terR*:*terR*T, *ble* | This study. |
| SBUG844*akuB**hapX* | *akuB*::*hph*; *hapX*::*ptrA* | This study. |
| SBUG844*akuB**hapX/*An*hapX*C | *akuB*::*hph*; *hapX*::*hapX*AnC*, ble* | This study. |
| SBUG844*akuB**sreA* | *akuB*::*hph*; *sreA*::*ptrA* | This study. |
| SBUG844*akuB**sreA*:*sreA*C | *akuB*::*hph*; *sreA*::*ptrA; sreA*, *ble* | This study. |
| SBUG844*akuB**sidA* | *akuB*::*hph*; *sidA*::*ptrA* | This study. |
| SBUG844*akuB**sidA/sidA*C | *akuB*::*hph*; *sidA*::*sidA*C*, ble* | This study. |
| SBUG844*akuB**terA**sidA* | *akuB*::*hph*; *terA*::*ptrA;* *sidA*::*ble* | This study. |
|  |  |  |
